# Supplementary material
Source: publisher figshare collection journal article supplement (https://gsajournals.figshare.com/ndownloader/files/25721237)
Supplement: Supplementary file 1 [file 25721237]

## Sheet: 1kb promoter
Table S4. Number of cis-elements identified in DEGs found at the N5 locus and its flanking region
cis-element in the region of -1 to -500bp	D13G0096	D13G0098	D13G0137	D13G0139	D13G0152	D13G0015	D13G0033	D13G0037	D13G0060	D13G0114	D13G0142	D13G0165	D13G0174	D13G0199	Comments on the cis-element
ARFAT		1								1					ARF (auxin response factor) binding site found in the promoters of primary/early auxin response genes of Arabidopsis thaliana
ARR1AT	6	9	3	7	8	5	3	3	4	8	5	6	6	4	ARR1 (Arabidopsis response regulator1)-binding element, response to cytokinin
ASF1MOTIFCAMV	1	2	1					1						3	ASF-1 binding site
BIHD1OS	1		2	2	2				1	1		2		1	Binding site of OsBIHD1, a rice BELL homeodomain transcription factor
BOXLCOREDCPAL		2										1			Consensus of the putative "core" sequences of box-L-like sequences in carrot
CACTFTPPCA1	9	5	8	10	8	2	4	6	3	4	7	2	3	12	cis-Regulatory elements for mesophyll-specific gene expression in the C4 plant Flaveria trinervia
CARGCW8GAT	2		4		6	2	2	2	6				2	2	Binding site for AGL16
CCAATBOX1		1		1			1	2	2	1		2	1	2	Common sequence found in the 5'-non-coding regions of eukaryotic genes
CPBCSPOR	1			1	1	1	2								The sequence critical for Cytokinin-enhanced Protein Binding in vitro
CURECORECR	6			6				4		4	2			4	core of a CuRE (copper-response element)
DOFCOREZM	8	3	13	10	14	4	16	6	10	7	3	11	16	6	Core site required for binding of Dof proteins in maize
EBOXBNNAPA	2	4		10	6		4	6	4					4	E-box of napA storage-protein gene of Brassica napus
EECCRCAH1	1	1	1	1	1	1					1		2	1	EEC; Consensus motif of the two enhancer elements, EE-1 and EE-2
ERELEE4		1			3								1		ERE (ethylene responsive element) of tomato
GATABOX		1	4	4	6	2	6	2	4	6	4	3	3		Three GATA box repeats were found in the promoter of Petunia chlorophyll a/b binding protein
GT1CONSENSUS	6	6	5	5	6	7	4	4	4	6	4	5	9	6	Consensus GT-1 binding site in many light-regulated genes
GT1GMSCAM4	2	1	2	1	1	2		1		1	3	3	5	3	GT-1 motif found in the promoter of soybean (Glycine max) CaM isoform
GTGANTG10	4	4	4	4	2	1	2	4	4	3	1	1		7	GTGA motif found in the promoter of the tobacco (N.t.) late pollen gene g10 which shows homology to pectate lyase
INRNTPSADB	1	1	1	1	1	1	1	3	1			2	4	1	Inr (initiator) elements found in the tobacco psaDb gene promoter without TATA boxes
MARTBOX	3	6				4		2	2		2	4			T-Box; Motif found in SAR (scaffold attachment region)
MYBPLANT		1					1								Plant MYB binding site
MYBPZM		1							1	1					Core of consensus maize P (myb homolog) binding site
MYCCONSENSUSAT	2	4		10	6		4	6	4					4	MYC recognition site found in the promoters of the dehydration-responsive gene rd22 and many other genes
NODCON1GM		1	1	2	3		3		1		1	1			One of two putative nodulin consensus sequences
NODCON2GM	2		3	5	1		3	1		1	2	5	2	2	One of two putative nodulin consensus sequences
OSE1ROOTNODULE		1	1	2	3		3		1		1	1			One of the consensus sequence motifs of organ-specific elements
OSE2ROOTNODULE	2		3	5	1		3	1		1	2	5	2	2	One of the consensus sequence motifs of organ-specific elements
POLLEN1LELAT52	4	5	4	4	5	5	3	5	4	4	5	4	13	3	One of two co-dependent regulatory elements responsible for pollen specific activation of tomato (L.e.) lat52 gene
PREATPRODH	1			1							1		1		PRE (Pro- or hypoosmolarity-responsive element) found in the promoter region of proline dehydrogenase (ProDH) gene in Arabidopsis
PRECONSCRHSP70A	1	1													Consensus sequence of PRE (plastid response element) in the promoters of HSP70A in Chlamydomonas
PYRIMIDINEBOXOSRAMY1A	1		1			1	1		3		1	2	1	2	Pyrimidine box found in rice (O.s.) alpha-amylase (RAmy1A) gene
RAV1AAT		2		1					1	3	1				Binding consensus sequence of Arabidopsis (A.t.) transcription factor, RAV2
RBCSCONSENSUS		1	1							2					rbcS general consensus sequence
REALPHALGLHCB21		1				2	1	1				1			REalpha found in Lemna gibba Lhcb21 gene promoter
ROOTMOTIFTAPOX1	3	3	1	2	4	20	3	1	4	6	12	10	5		Motif found both in promoters of rolD
SEBFCONSSTPR10A		1	1												Binding site of the potato silencing element binding factor (SEBF) gene found in promoter of pathogenesis-related gene (PR-10a)
SEF1MOTIF		1					1			1	1	2			"SEF1 (soybean embryo factor 1)" binding motif
SEF3MOTIFGM		1					1		1	1			1	1	SEF3 binding site; Soybean (G.m.) consensus sequence
SEF4MOTIFGM7S	2	2	2		2	7		5	2	1	3	4	5	1	SEF4 binding site; Soybean (G.m.) consensus sequence
SURECOREATSULTR11		2								1		1			Core of sulfur-responsive element (SURE) found in the promoter of SULTR1;1 high-affinity sulfate transporter gene in Arabidopsis
TBOXATGAPB	2				1		1	1					1		Tbox found in the Arabidopsis thaliana (A.T.) GAPB gene promoter
WBOXATNPR1	2	2	1	2	1			1	1		1	2	1		W-box found in promoter of Arabidopsis thaliana (A.t.) NPR1 gene. They were recognized specifically by salicylic acid (SA)-induced WRKY DNA binding proteins
WBOXHVISO1		1	2	2					1	1	1	1	1		SUSIBA2 bind to W-box element in barley iso1 (encoding isoamylase1) promoter
WBOXNTERF3		1	3	2			2	1	2	1	2	1	2	2	W box found in the promoter region of a transcriptional repressor ERF3 gene in tobacco
WRKY71OS	2	3	6	4	2		2	2	3	2	2	3	2	6	Binding site of rice WRKY71, a transcriptional repressor of the gibberellin signaling pathway
cis-element in the region of -501 bp to -1kb	D13G0096	D13G0098	D13G0137	D13G0139	D13G0152	D13G0015	D13G0033	D13G0037	D13G0060	D13G0114	D13G0142	D13G0165	D13G0174	D13G0199	Comments on the cis-element
ABRELATERD1	2	1	1			3	1	1	1	1			2	5	ABRE-like sequence required for etiolation-induced expression of erd1 (early responsive to dehydration) in Arabidopsis
ABRERATCAL	1					1	2						1	2	ABRE-related sequenc identified in the upstream regions of 162 Ca(2+)-responsive upregulated genes
ACGTABREMOTIFA2OSEM	1					2								3	Abscisic Acid Response Element
ACGTATERD1	2	4	4			4	2	6	4	4		2	4	14	ACGT sequence required for etiolation-induced expression of erd1 (early responsive to dehydration) in Arabidopsis
ACGTCBOX		2												2	ACGT element
AMYBOX1	1							1			1		1		Conserved sequence found in 5'-upstream region of alpha-amylase gene of rice, wheat, barley
ARFAT		2								1					ARF (auxin response factor) binding site found in the promoters of primary/early auxin response genes of Arabidopsis thaliana
ARR1AT	9	18	10	13	9	9	7	8	8	17	10	12	11	8	ARR1 (Arabidopsis response regulator1)-binding element, response to cytokinin
ASF1MOTIFCAMV	1	2	1					1						4	ASF-1 binding site
BIHD1OS	5	1	3	2	5	4			1	4	1	3	3	2	Binding site of OsBIHD1, a rice BELL homeodomain transcription factor
BOXLCOREDCPAL		2							1	1		1	2		Consensus of the putative "core" sequences of box-L-like sequences in carrot
CACGTGMOTIF	2					2							2	2	Binding site of Arabidopsis GBF4
CACTFTPPCA1	20	18	22	15	22	13	9	13	6	8	12	9	7	19	cis-Regulatory elements for mesophyll-specific gene expression in the C4 plant Flaveria trinervia
CARGCW8GAT	4		6		6	4	4	6	10			2	2	2	Binding site for AGL15
CCA1ATLHCB1		1	1					1		1	2				CCA1 (myb-related transcription factor) binding site
CCAATBOX1	1	2		4	2	1	2	2	2	1		3	2	4	Common sequence found in the 5'-non-coding regions of eukaryotic genes
CEREGLUBOX2PSLEGA		1	1												cereal glutenin box in pea legumin gene (legA
CGACGOSAMY3	1					1									CGACG element found in the GC-rich regions of the rice Amy3D gene
CPBCSPOR	1	2	1	2	2	2	2	1							The sequence critical for Cytokinin-enhanced Protein Binding in vitro
CURECORECR	6	2	4	6	2	4	2	4	2	6	2	2	2	4	core of a CuRE (copper-response element)
DOFCOREZM	13	13	21	16	27	9	28	13	17	17	8	17	27	11	Core site required for binding of Dof proteins in maize
DPBFCOREDCDC3	2	1				1		1	2				3	4	A novel class of bZIP transcription factors, DPBF-1 and 2 (Dc3 promoter-binding factor-1 and 2) binding core sequence
EBOXBNNAPA	8	6		18	6	10	6	6	12	6	4	6	8	10	E-box of napA storage-protein gene of Brassica napus
EECCRCAH1	2	3	1	4	2	1					1		3	1	EEC; Consensus motif of the two enhancer elements, EE-1 and EE-2
ERELEE4		1	1		4							2	1		ERE (ethylene responsive element) of tomato
GADOWNAT	1					2								3	Sequence present in 24 genes in the GA-down regulated d1 cluster (106 genes) found in Arabidopsis seed germination
GAREAT	1	1									1		2		GARE (GA-responsive element)
GATABOX	3	2	8	10	11	5	10	8	13	9	6	13	6	7	Three GATA box repeats were found in the promoter of Petunia chlorophyll a/b binding protein
GT1CONSENSUS	14	9	7	9	12	10	9	12	9	11	10	13	13	10	Consensus GT-1 binding site in many light-regulated genes
GT1GMSCAM4	5	2	2	2	3	4	3	2		5	4	5	5	4	GT-1 motif found in the promoter of soybean (Glycine max) CaM isoform
GTGANTG10	6	7	7	5	5	4	2	5	7	6	2	4	5	10	GTGA motif found in the promoter of the tobacco (N.t.) late pollen gene g10 which shows homology to pectate lyase
IBOXCORE	2		2	2	5	2	4	4	6	2	2	4	4	3	I-box; Conserved sequence upstream of light-regulated genes
INRNTPSADB	1	2	1	2	3	2	2	7	2		1	3	5	2	Inr (initiator) elements found in the tobacco psaDb gene promoter without TATA boxes
L1BOXATPDF1	1								2						L1 box found in promoter of Arabidopsis thaliana PROTODERMAL FACTOR1 (PDF1) gene, involved in L1 layer-specific expression
LECPLEACS2	2			1		3	1	1	1		2		1	2	Core element in LeCp (tomato Cys protease) binding cis-element
MARABOX1	1					1									A-box found in SAR (scaffold attachment region)
MARTBOX	4	7	1	2		5		5	3		7	4	6	5	T-Box; Motif found in SAR (scaffold attachment region)
MYB1AT	1		1	5	4	3	2	2		6	3	3			MYB recognition site found in the promoters of the dehydration-responsive gene rd22 and many other genes in Arabidopsis
MYBCORE		1	2	2	6	1	2	1		2			1	2	Binding site for all animal MYB and at least two plant MYB proteins ATMYB1 and ATMYB2
MYBCOREATCYCB1		1	1			1				1			2	3	Myb core in the 18 bp sequence which is able to activate reporter gene without leading to M-phase-specific expression
MYBGAHV	1										1		1		Central element of gibberellin (GA) response complex (GARC) in high-pI alpha-amylase gene in barley
MYBPLANT		1					1								Plant MYB binding site
MYBPZM		1							2	2			2		Core of consensus maize P (myb homolog) binding site
MYBST1	1		1	2		1	1	1	1		2	2	2	4	Core motif of MybSt1 (a potato MYB homolog) binding site
MYCATERD1	1	1						1	2				2	1	MYC recognition sequence necessary for expression of erd1 (early responsive to dehydration) in dehydrated Arabidopsis
MYCATRD22	1	1						1	2				2	1	Binding site for MYC (rd22BP1) in Arabidopsis dehydration-resposive gene, rd22
MYCCONSENSUSAT	8	6		18	6	10	6	6	12	6	4	6	8	10	MYC recognition site found in the promoters of the dehydration-responsive gene rd22 and many other genes
NODCON1GM	1	1	2	2	5		4	1	1		2	1	1	1	One of two putative nodulin consensus sequences
NODCON2GM	2	1	5	6	4		5	4		1	2	7	3	3	One of two putative nodulin consensus sequences
NTBBF1ARROLB		2	3	2	3	2	1	1	2		1	2	1	1	NtBBF1(Dof protein from tobacco) binding site in Agrobacterium rhizogenes
OSE1ROOTNODULE	1	1	2	2	5		4	1	1		2	1	1	1	One of the consensus sequence motifs of organ-specific elements
OSE2ROOTNODULE	2	1	5	6	4		5	4		2	2	7	3	3	One of the consensus sequence motifs of organ-specific elements
POLLEN1LELAT52	9	9	6	5	9	5	7	10	4	7	8	6	15	4	One of two co-dependent regulatory elements responsible for pollen specific activation of tomato (L.e.) lat52 gene
PREATPRODH	1		2	2							2		1	1	PRE (Pro- or hypoosmolarity-responsive element) found in the promoter region of proline dehydrogenase (ProDH) gene in Arabidopsis
PRECONSCRHSP70A	1	2		1					1						Consensus sequence of PRE (plastid response element) in the promoters of HSP70A in Chlamydomonas
PYRIMIDINEBOXOSRAMY1A	1		1	1		1	3	2	3		1	2	1	2	Pyrimidine box found in rice (O.s.) alpha-amylase (RAmy1A) gene
RAV1AAT		2	1	2	2	3			1	6	2	2	2		Binding consensus sequence of Arabidopsis (A.t.) transcription factor, RAV1
RBCSCONSENSUS	1	1	1					1		3		1			rbcS general consensus sequence
REALPHALGLHCB21	1	1		3	3	4	1	1			1	2			REalpha found in Lemna gibba Lhcb21 gene promoter
RHERPATEXPA7	1	2				1		1	1	1		1	1	1	"Right part of RHEs (Root Hair-specific cis-Elements)" conserved among the Arabidopsis thaliana A7 (AtEXPA7) orthologous genes
ROOTMOTIFTAPOX1	16	6	5	8	7	29	10	5	4	9	15	23	9	9	Motif found both in promoters of rolD
SEBFCONSSTPR10A		2	1										1	1	Binding site of the potato silencing element binding factor (SEBF) gene found in promoter of pathogenesis-related gene (PR-10a)
SEF1MOTIF	2	1					1			1	1	3	1		"SEF1 (soybean embryo factor 1)" binding motif
SEF3MOTIFGM		1				1	2		1	2	1	1	1	2	SEF3 binding site; Soybean (G.m.) consensus sequence
SEF4MOTIFGM7S	5	2	6	4	4	12		9	3	4	11	4	8	3	SEF4 binding site; Soybean (G.m.) consensus sequence
SORLREP3AT	1					1									Sequences Over-Represented in Light-Repressed Promoters (SORLREPs) in Arabidopsis
SP8BFIBSP8BIB		1						2	1		3	1			One of SPBF binding site (SP8b)
SURECOREATSULTR11		4			1					1		1	1		Core of sulfur-responsive element (SURE) found in the promoter of SULTR1;1 high-affinity sulfate transporter gene in Arabidopsis
TAAAGSTKST1	1	3	4	3	7	3	8	5	6	6	3	4	5	2	TAAAG motif found in promoter of Solanum tuberosum (S.t.) KST1 gene
TBOXATGAPB	2			1	1	1	1	1	1	1			1		Tbox found in the Arabidopsis thaliana (A.T.) GAPB gene promoter
WBOXATNPR1	3	2	3	3	2	2		2	2	2	1	3	1		W-box found in promoter of Arabidopsis thaliana (A.t.) NPR1 gene. They were recognized specifically by salicylic acid (SA)-induced WRKY DNA binding proteins
WBOXHVISO1		1	4	4				1	2	1	1	3	2		SUSIBA2 bind to W-box element in barley iso1 (encoding isoamylase1) promoter
WBOXNTERF3		1	5	4	2		3	3	4	2	2	3	3	2	W box found in the promoter region of a transcriptional repressor ERF3 gene in tobacco
WRKY71OS	6	4	9	6	7	4	3	4	5	6	3	6	6	8	Binding site of rice WRKY71, a transcriptional repressor of the gibberellin signaling pathway
Up-regulated in the mutant
Down-regulated in the mutant
Only the cis-elements identified in the promoter of D13G0096 or D13G0098 are shown.
